# Supplementary material
Source: PubMed Central journal article supplement (PMC8822620)
Supplement: mmc1.pdf [file mmc1.pdf]

**Supplemental information**

**Interferon- $\gamma$  primes macrophages for pathogen  
ligand-induced killing via a caspase-8  
and mitochondrial cell death pathway**

**Daniel S. Simpson, Jiyi Pang, Ashley Weir, Isabella Y. Kong, Melanie Fritsch, Maryam Rashidi, James P. Cooney, Kathryn C. Davidson, Mary Speir, Tirta M. Djajawi, Sebastian Hughes, Liana Mackiewicz, Merle Dayton, Holly Anderton, Marcel Doerflinger, Yexuan Deng, Allan Shuai Huang, Stephanie A. Conos, Hazel Tye, Seong H. Chow, Arfatur Rahman, Raymond S. Norton, Thomas Naderer, Sandra E. Nicholson, Gaetan Burgio, Si Ming Man, Joanna R. Groom, Marco J. Herold, Edwin D. Hawkins, Kate E. Lawlor, Andreas Strasser, John Silke, Marc Pellegrini, Hamid Kashkar, Rebecca Feltham, and James E. Vince**

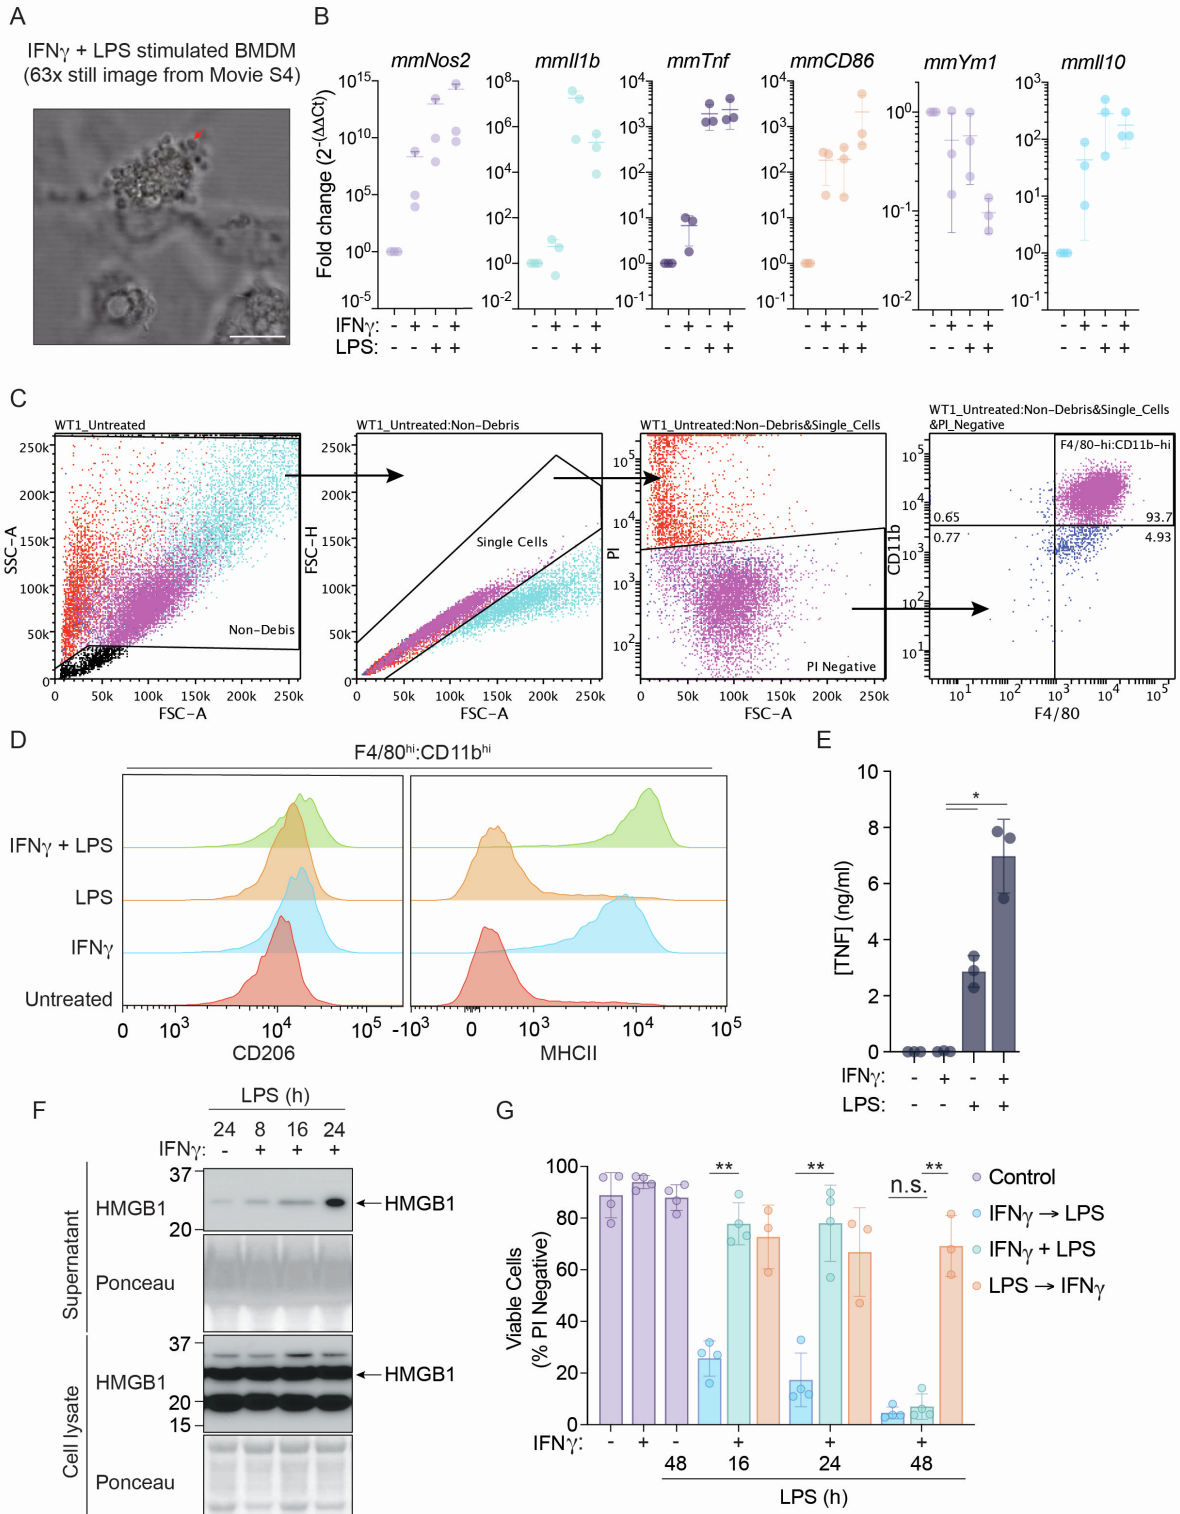

**Figure S1. IFN $\gamma$  primes macrophages for LPS-induced inflammatory-associated apoptotic cell death. Related to Figure 1.**

(A) Representative still image from Movie S4 of WT BMDMs primed with IFN $\gamma$  (50 ng/mL) overnight and then stimulated with LPS (50 ng/mL) for 24 h. Red arrow indicates apoptotic body formation. Scale bar (white) = 10  $\mu$ m.

(B - E) WT BMDMs were treated with IFN $\gamma$  (50 ng/mL) overnight, then with LPS (50 ng/mL) for 16 h (n = 3). (B) qPCR analysis was performed for expression of macrophage phenotypic markers and plotted as the fold-change expression relative to unstimulated BMDMs. *I8s* was used as a housekeeping

gene expression control. (C and D) Macrophage receptor expression was assessed by flow cytometry. Gating strategy: Cell debris, doublets, and dead (PI positive cells) were removed. Representative data from one of three independent biological replicates displaying similar observations. (E) TNF secretion was measured by ELISA.

(F) Immunoblot analysis of cell supernatants and cell lysates of WT BMDMs primed with IFN $\gamma$  (50 ng/mL) overnight and then stimulated with LPS (50 ng/mL) for 8 - 24 h. Ponceau staining is used as a loading control (n = 2).

(G) WT BMDMs were either primed with IFN $\gamma$  (50 ng/mL) overnight and then stimulated with LPS (50 ng/mL) (IFN $\gamma$   $\rightarrow$  LPS), co-stimulated at the same time with both IFN $\gamma$  (50 ng/mL) and LPS (50 ng/mL) (IFN $\gamma$  + LPS), or primed with LPS (50 ng/mL) overnight and then stimulated with IFN $\gamma$  (50 ng/mL) (LPS  $\rightarrow$  IFN $\gamma$ ) for 16, 24 or 48 h. Cell death was assessed by PI exclusion as measured by flow cytometry (n = 3 - 4).

Data represent the mean value  $\pm$  SD, or a representative immunoblot or FACS plot, from indicated n independent experiments.  $p > 0.05$  (n.s.),  $p \leq 0.05$  (\*),  $p \leq 0.01$  (\*\*).

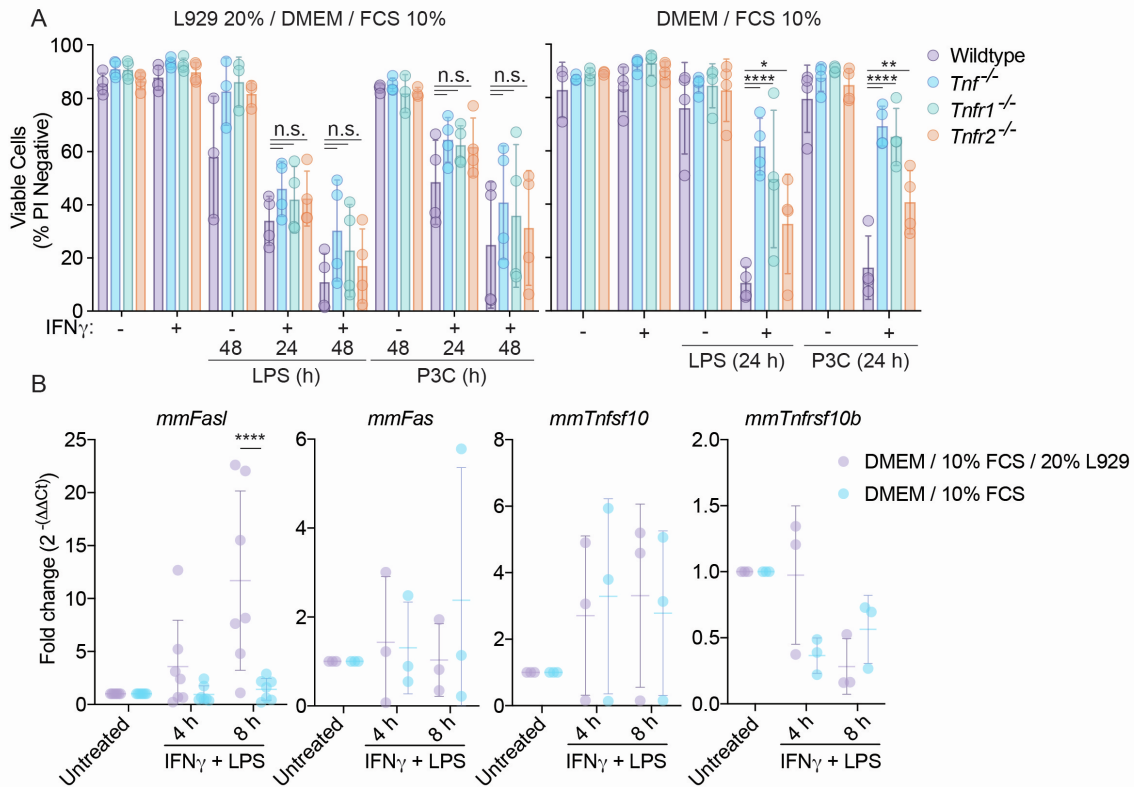

**Figure S2. IFN $\gamma$ /LPS-induced cell death correlates with L929 medium-dependent increases in *Fas* expression and can occur independent of TNF signaling. Related to Figure 1.**

(A) WT, *Tnf*<sup>-/-</sup>, *Tnfrsf1a*<sup>-/-</sup> (TNFR1 deleted) or *Tnfrsf1b*<sup>-/-</sup> (TNFR2 deleted) BMDMs were treated with IFN $\gamma$  (50 ng/mL) overnight, then with either LPS (50 ng/mL), or Pam3CSK4 (P3C, 500 ng/mL) for 24 or 48 h in either 20% L929 conditioned medium (vehicle medium: DMEM containing 10% FCS) (left graph) or DMEM containing 10% FCS (right graph). Cell death was assessed by PI exclusion as measured by flow cytometry (n = 4).

(B) WT BMDMs were treated with IFN $\gamma$  (50 ng/mL) overnight, then with LPS (50 ng/mL) for 4 or 8 h, in either 20% L929 conditioned medium (vehicle medium: DMEM containing 10% FCS) or DMEM containing 10% FCS. qPCR analysis was performed for expression of *Fasl* (n = 7), *Fas* (n = 3), *Tnfsf10* (n = 3) or *Tnfsf10b* (n = 3) and plotted as the fold-change expression relative to unstimulated BMDMs. *Hprt* was used as a housekeeping gene expression control.

Data represent the mean value  $\pm$  SD from indicated n independent experiments. p > 0.05 (n.s.), p  $\leq$  0.05 (\*), p  $\leq$  0.01 (\*\*), p  $\leq$  0.0001 (\*\*\*\*).

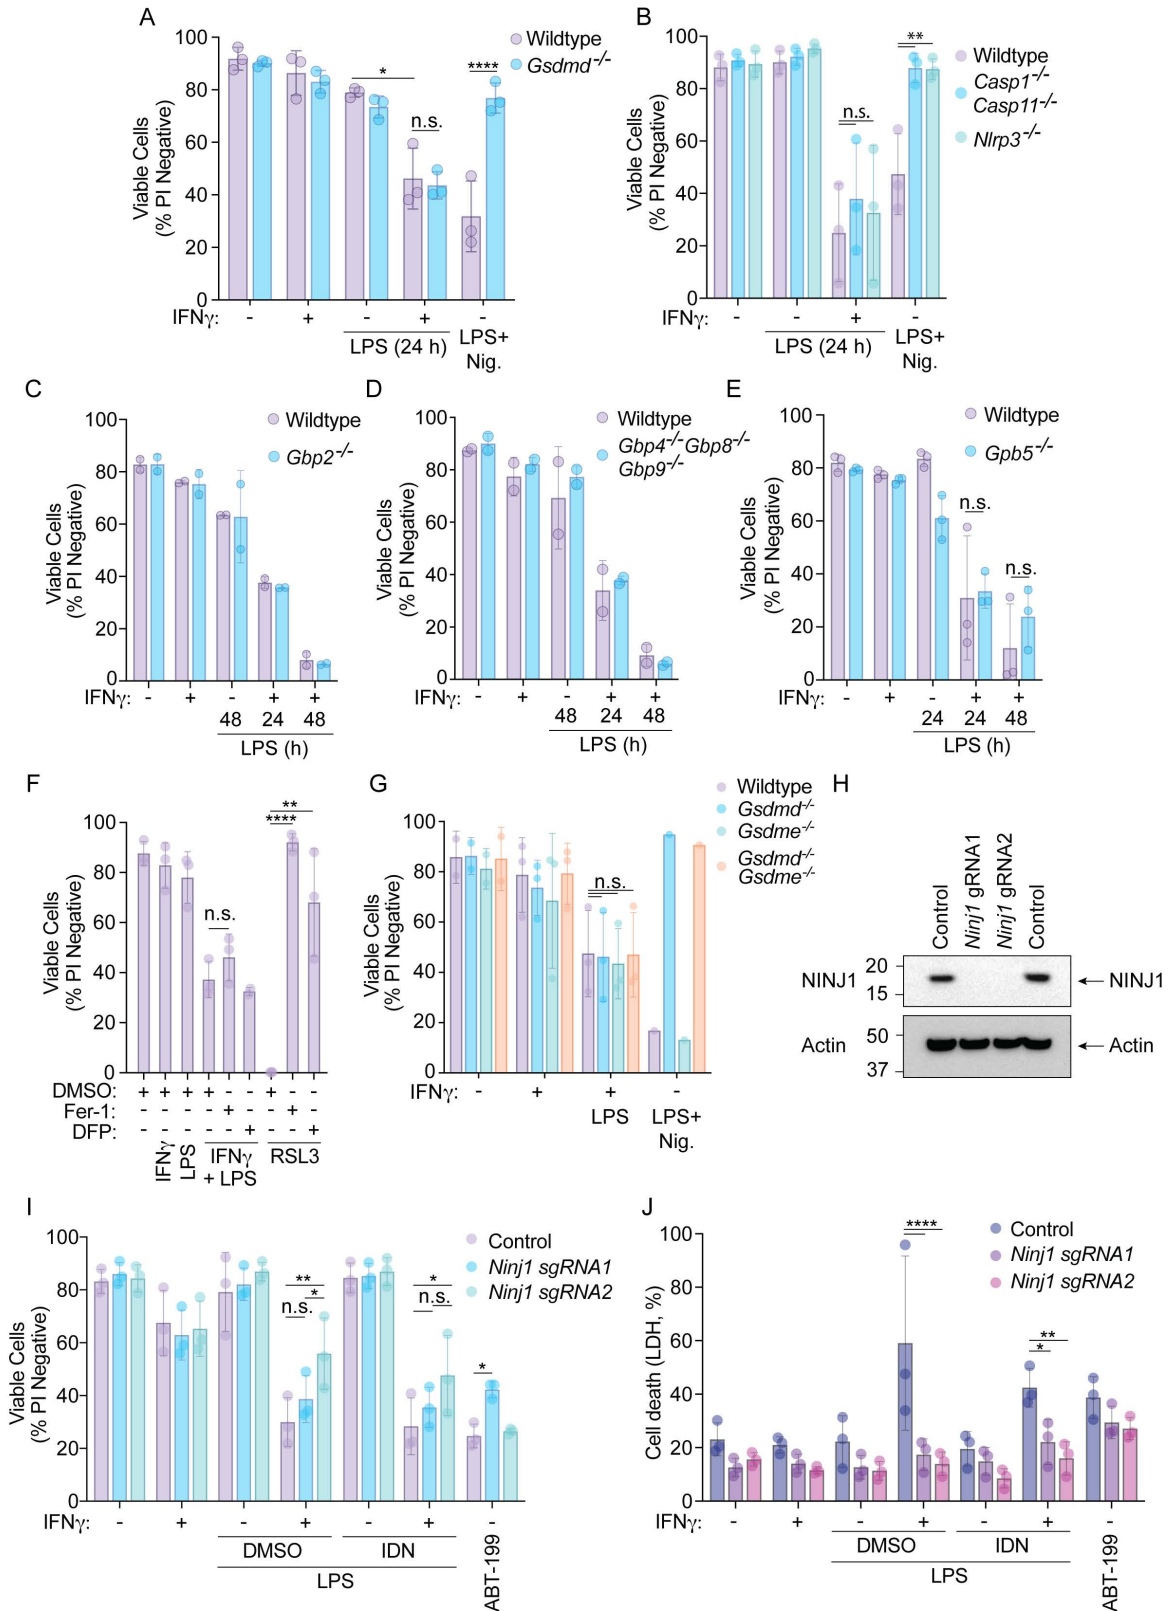

**Figure S3. IFN $\gamma$ /LPS-induced cell death proceeds in the absence of pyroptosis, ferroptosis, and the cell lysis protein Ninj1. Related to Figure 2.**

(A – E) WT and (A) *Gsdmd*<sup>-/-</sup> (n = 3), (B) *Nlrp3*<sup>-/-</sup>, *Casp1*<sup>-/-</sup>*Casp11*<sup>-/-</sup> (n = 3), (C) *Gbp2*<sup>-/-</sup> (n = 2), (D) *Gbp4*<sup>-/-</sup>*Gbp8*<sup>-/-</sup>*Gbp9*<sup>-/-</sup> (n = 2), (E) *Gbp5*<sup>-/-</sup> (n = 3) BMDMs were treated with IFN $\gamma$  (50 ng/mL) overnight then with LPS (50 ng/mL) for 24 or 48 h. (A and B) Treatment with LPS (200 ng/mL) for 2 h then with

Nigericin (Nig., 10  $\mu$ M) for 15 min (pyroptosis) was used as a control. Cell death was assessed by PI exclusion as measured by flow cytometry.

(F) WT BMDMs were treated with IFN $\gamma$  (50 ng/mL) overnight then with LPS (50 ng/mL), DMSO or inhibitors of ferroptosis: Ferrostatin-1 (Fer-1, 2  $\mu$ M) or Deferiprone (DFP, 150  $\mu$ M) for 24 h. Pre-treatment with DMSO, Ferrostatin-1 (Fer-1, 2  $\mu$ M) or Deferiprone (DFP, 150  $\mu$ M) for 15 minutes, then treatment with RSL3 (500 nM) for 24 h (ferroptosis) was used as a controls. Cell death was assessed by PI exclusion as measured by flow cytometry (n = 3).

(G) WT, *Gsdmd*<sup>-/-</sup>, *Gsdme*<sup>-/-</sup>, or *Gsdmd*<sup>-/-</sup>*Gsdme*<sup>-/-</sup> BMDMs were treated with IFN $\gamma$  (50 ng/mL) overnight then with LPS (50 ng/mL) for 24 or 48 h. Treatment with LPS (200 ng/mL) for 2 h then with Nigericin (Nig., 10  $\mu$ M) for 15 min (pyroptosis) was used as a control. Cell death was assessed by PI exclusion as measured by flow cytometry (n = 1 – 3).

(H) Immunoblot confirming NINJ1 gene deletion in two *Ninj1*<sup>-/-</sup> cell lines vs Control (Cas9) iBMDMs generated on the IFN $\gamma$ /LPS sensitive *Mkl1*<sup>-/-</sup> background (n = 2).

(I and J) Control or *Ninj1*<sup>-/-</sup> iBMDMs validated in (H) were treated with IFN $\gamma$  (50 ng/mL) overnight then with LPS (50 ng/mL), DMSO, IDN-6556 (IDN, 5  $\mu$ M) for 24 h, or as a control ABT-199 (25  $\mu$ M for 16 h) (Kayagaki *et al.*, 2021). (I) Cell death was assessed by PI exclusion as measured by flow cytometry and (J) late-stage membrane rupture was assessed by LDH release into cell supernatants (n = 3).

Data represent the mean value  $\pm$  SD, or a representative immunoblot, from indicated n independent experiments. p > 0.05 (n.s.), p  $\leq$  0.05 (\*), p  $\leq$  0.01 (\*\*), p  $\leq$  0.0001 (\*\*\*\*)..

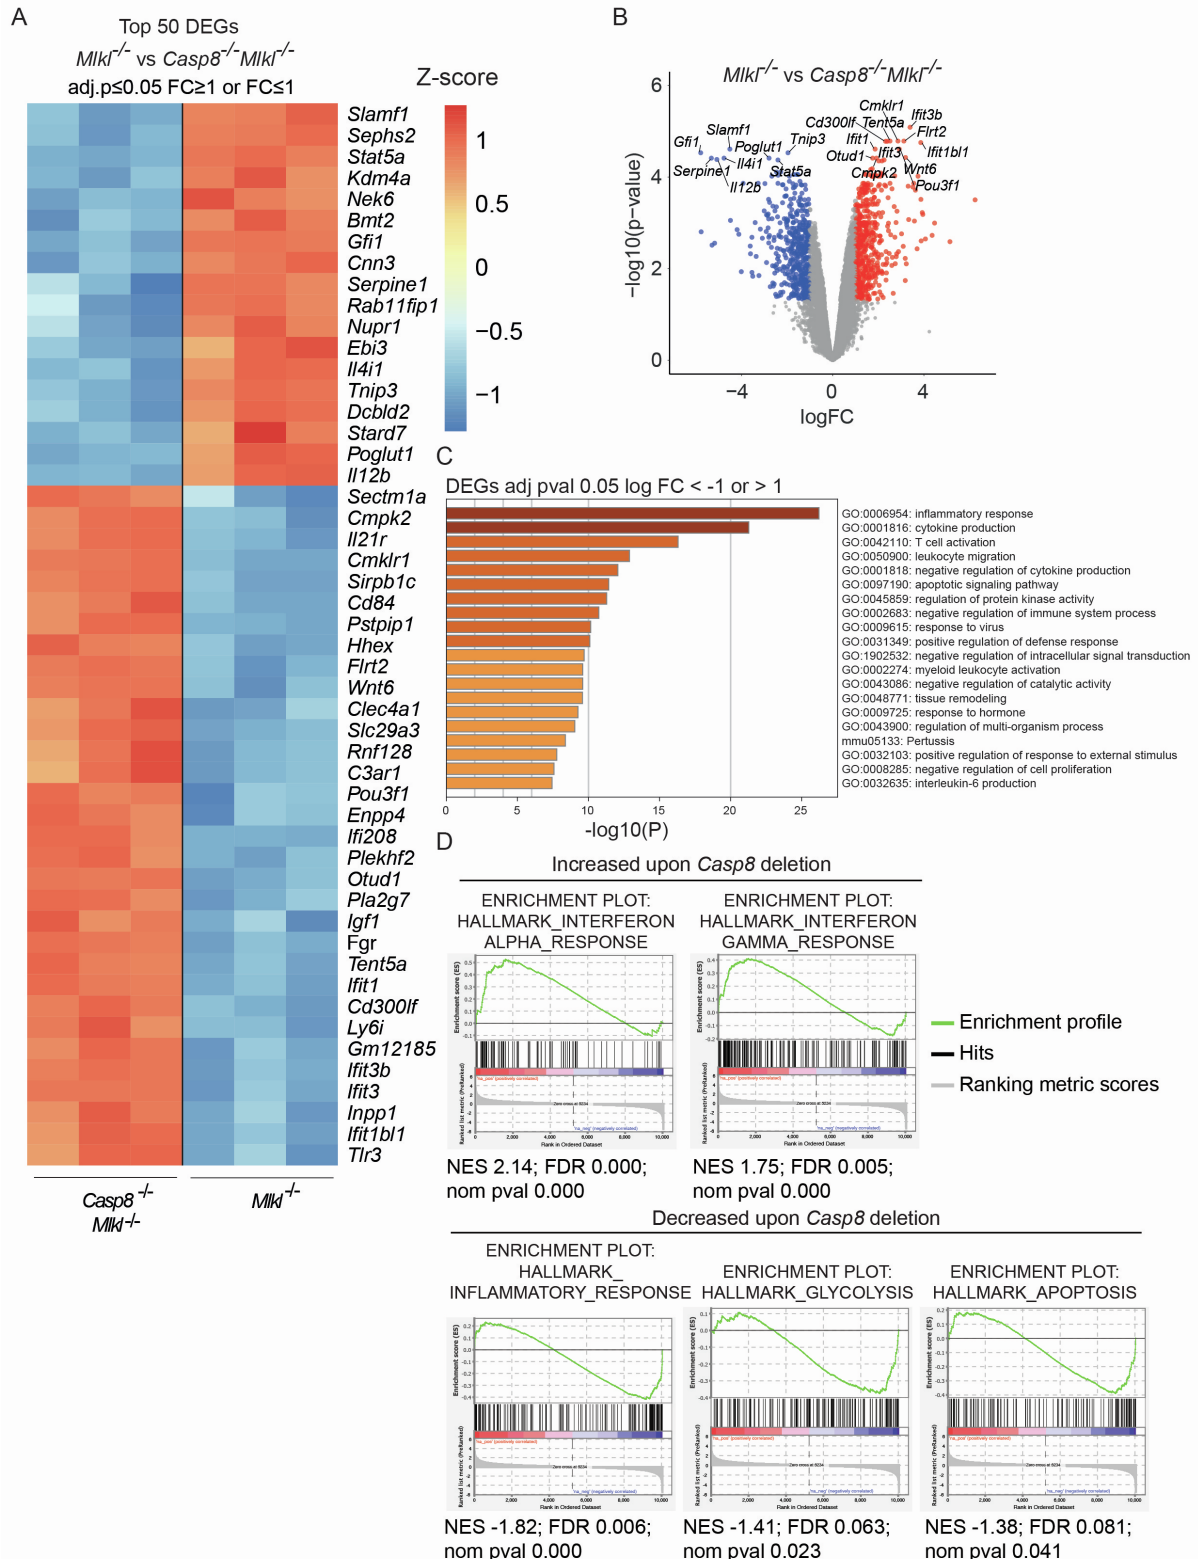

**Figure S4. Caspase-8 mediates IFN $\gamma$ /LPS-induced transcriptional programming in macrophages. Related to Figure 4.**

*Mkl1*<sup>-/-</sup> and *Casp8*<sup>-/-</sup>*Mkl1*<sup>-/-</sup> BMDMs were treated with IFN $\gamma$  (50 ng/mL) overnight then LPS (50 ng/mL) for 7 h followed by RNA isolation and 3'RNA-sequencing, as described in Figure 4 (n = 3).

(A) Heatmap for top 50 significant differentially expressed genes (DEGs) for IFN $\gamma$ /LPS stimulated *Mkl1*<sup>-/-</sup> vs *Casp8*<sup>-/-</sup>*Mkl1*<sup>-/-</sup> BMDMs. Adjusted p ≤ 0.05 and cut-off values logFC ≥ 1 or logFC ≤ -1.

- (B) Volcano plot highlighting DEGs that are up- or down-regulated in IFN $\gamma$ /LPS stimulated *Casp8*<sup>-/-</sup> *Mik1*<sup>-/-</sup> BMDMs in comparison to similarly treated *Mik1*<sup>-/-</sup> BMDMs. The top 20 DEGs are labelled. Adjusted  $p \leq 0.05$  and cut-off values  $\log_{2}FC \geq 1$  or  $\log_{2}FC \leq -1$ .
- (C) Gene Ontology analysis for significant DEGs for IFN $\gamma$ /LPS stimulated *Mik1*<sup>-/-</sup> vs *Casp8*<sup>-/-</sup> *Mik1*<sup>-/-</sup> BMDMs. Adjusted  $p \leq 0.05$  and cut-off values  $\log_{2}FC \geq 1$  or  $\log_{2}FC \leq -1$ .
- (D) GSEA analysis of genes differentially regulated between IFN $\gamma$ /LPS treated *Mik1*<sup>-/-</sup> BMDMs vs *Casp8*<sup>-/-</sup> *Mik1*<sup>-/-</sup> BMDMs.



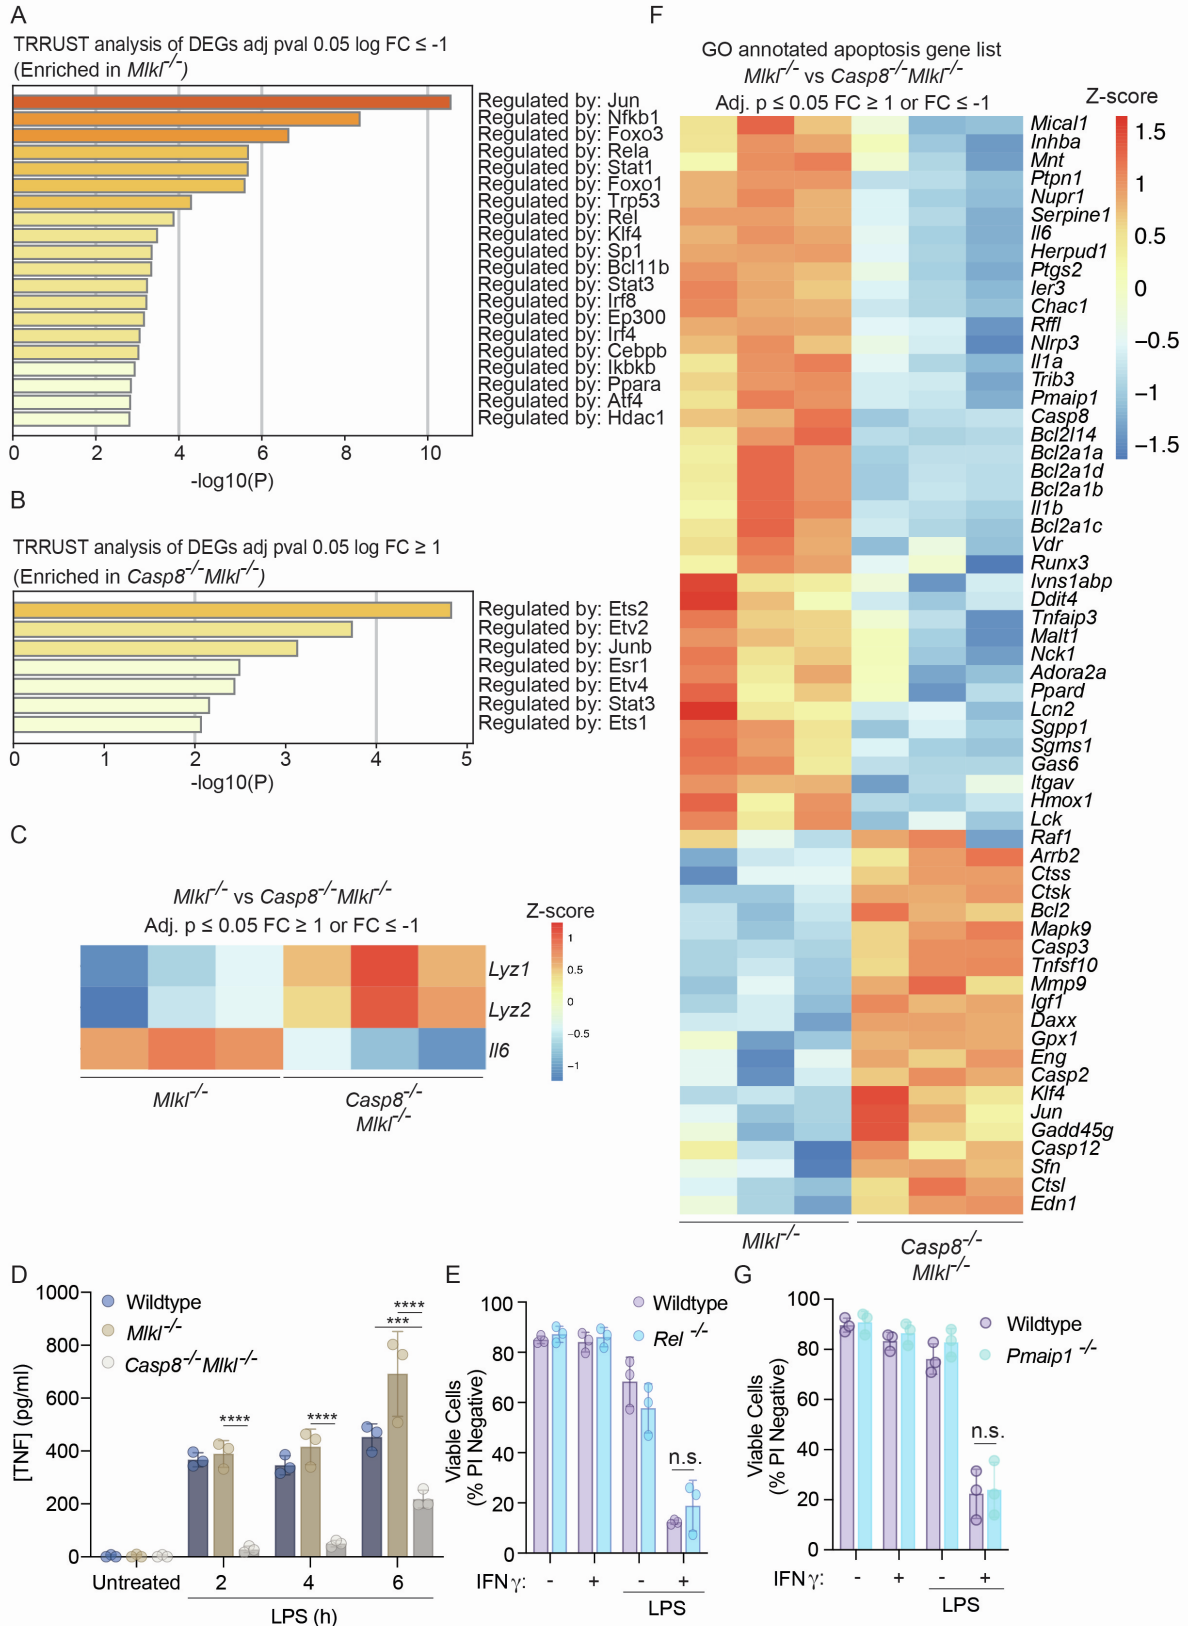

**Figure S5.** Upon IFN $\gamma$ /LPS stimulation, caspase-8 regulates diverse transcriptional pathways to promote an inflammatory and metabolically active phenotype in macrophages. Related to Figure 4.

(A – C, F) *Mkl1*<sup>-/-</sup> and *Casp8*<sup>-/-</sup>*Mkl1*<sup>-/-</sup> BMDMs were treated with IFN $\gamma$  (50 ng/mL) overnight then LPS (50 ng/mL) for 7 h followed by RNA isolation and 3' mRNA-sequencing, as described in Figure 4 (n = 3).

(A) TRRUST analysis of significant DEGs downregulated in *Casp8*<sup>-/-</sup>*Mkl1*<sup>-/-</sup> BMDMs as compared to *Mkl1*<sup>-/-</sup> BMDMs, displaying predicted transcription factors that regulate DEGs. Adjusted p  $\leq$  0.05 and cut-off values logFC  $\leq$  -1.

(B) TRRUST analysis of significant DEGs upregulated in *Casp8*<sup>-/-</sup>*Mkl1*<sup>-/-</sup> BMDMs as compared to *Mkl1*<sup>-/-</sup> BMDMs, displaying predicted transcription factors that regulate DEGs. Adjusted p  $\leq$  0.05 and cut-off values logFC  $\geq$  1.

(C) Heatmap for *Lyz1*, *Lyz2* and *Il6* expression in IFN $\gamma$ /LPS-treated *Mkl1*<sup>-/-</sup> vs *Casp8*<sup>-/-</sup>*Mkl1*<sup>-/-</sup> BMDMs. Adjusted p  $\leq$  0.05 and cut-off values logFC  $\geq$  1 or logFC  $\leq$  -1.

(D) TNF secretion in wildtype (WT), *Mkl1*<sup>-/-</sup> or *Casp8*<sup>-/-</sup>*Mkl1*<sup>-/-</sup> BMDMs stimulated with LPS (50 ng/mL) for 2, 4, or 6 h (n = 3).

(E) WT or *Rel*<sup>-/-</sup> BMDMs were treated with IFN $\gamma$  (50 ng/mL) overnight then stimulated with LPS (50 ng/mL) for 24 h. Cell death was assessed by PI exclusion as measured by flow cytometry (n = 3).

(F) Heatmap for significant DEGs involved in GO-annotated apoptosis related pathways (see **Table S2 and S3**) that are enriched in IFN $\gamma$ /LPS-treated *Mkl1*<sup>-/-</sup> BMDMs or *Casp8*<sup>-/-</sup>*Mkl1*<sup>-/-</sup> BMDMs. Adjusted p  $\leq$  0.05 and cut-off values logFC  $\geq$  1 or logFC  $\leq$  -1.

(G) WT or *Pmaip1*<sup>-/-</sup> (lack the BH3-only protein NOXA) BMDMs were primed with IFN $\gamma$  (50 ng/mL) overnight and then stimulated with LPS (50 ng/mL) for 24 h, as indicated. Cell death was assessed by PI exclusion as measured by flow cytometry (n = 3).

Data are presented as the mean  $\pm$  SD of indicated n independent experiments. p > 0.05 (n.s.), p  $\leq$  0.001 (\*\*\*) , p  $\leq$  0.0001 (\*\*\*\*).

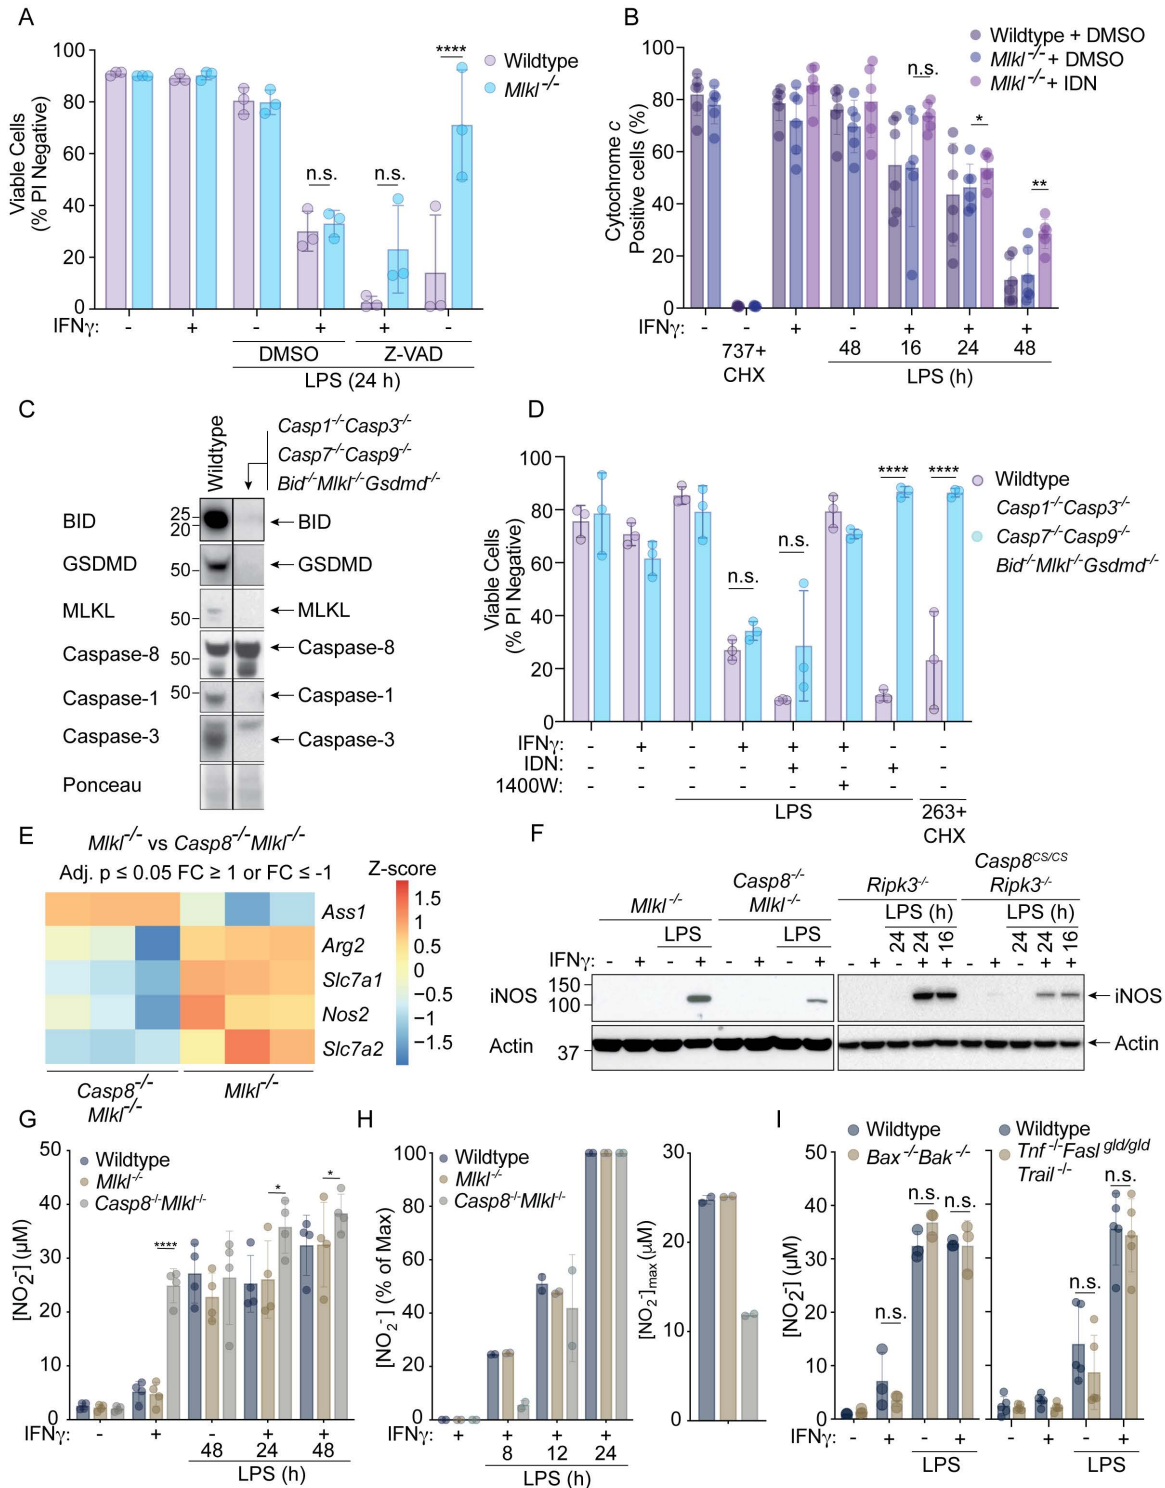

**Figure S6. Caspase-8 activity promotes iNOS expression and IFN $\gamma$ /LPS-induced cell death that is not blocked by pan-caspase inhibitor treatment. Related to Figure 5 and Figure 6.**

(A) WT or *Mikl*<sup>-/-</sup> BMDMs were treated with IFN $\gamma$  (50 ng/mL) overnight then with LPS (50 ng/mL) for 24 h  $\pm$  Z-VAD-fmk (Z-VAD, 20  $\mu$ M). Treatment with LPS plus Z-VAD for 24 h (necroptosis) was used as a control (n = 3).

(B) WT or *Mikl*<sup>-/-</sup> BMDMs were treated with IFN $\gamma$  (50 ng/mL) overnight then with LPS (50 ng/mL) for 16, 24 or 48 h  $\pm$  IDN-6556 (IDN, 5  $\mu$ M). Treatment with ABT-737 (1  $\mu$ M) plus cycloheximide (CHX, 10  $\mu$ g/mL) for 6 h was used as a positive control for BAX/BAK activation. Cytochrome *c* retention was measured by intracellular cytochrome *c* staining and flow cytometric analysis (n = 6).

(C) Immunoblot validation of Control WT (Cas-9) or *Casp1<sup>-/-</sup>Casp3<sup>-/-</sup>Casp7<sup>-/-</sup>Casp9<sup>-/-</sup>Bid<sup>-/-</sup>Mkl<sup>-/-</sup>Gsdmd<sup>-/-</sup>* hepta-gene targeted immortalized BMDMs (iBMDMs) confirming deletion of indicated genes. Unrelated lanes from each probe were removed and is indicated by a line (n = 1).

(D) Control WT (Cas-9) or *Casp1<sup>-/-</sup>Casp3<sup>-/-</sup>Casp7<sup>-/-</sup>Casp9<sup>-/-</sup>Bid<sup>-/-</sup>Mkl<sup>-/-</sup>Gsdmd<sup>-/-</sup>* hepta-gene targeted iBMDMs were treated with IFN $\gamma$  (50 ng/mL) overnight then with LPS (50 ng/mL) for 24 h  $\pm$  1400W (10  $\mu$ M), IDN (10  $\mu$ M), or vehicle (DMSO) as a control. Treatment with LPS plus IDN (10  $\mu$ M) for 24 h (necroptosis) or ABT-263 (1  $\mu$ M) plus cycloheximide (CHX, 10  $\mu$ g/mL) for 6 h (apoptosis) were used as controls. Cell death was assessed by PI exclusion as measured by flow cytometry (n = 3).

(E) Heatmap for significant DEGs involved in arginine metabolism, as detailed (Young *et al.*, 2018), in *Casp8<sup>-/-</sup>Mkl<sup>-/-</sup>* BMDMs vs *Mkl<sup>-/-</sup>* BMDMs treated with IFN $\gamma$ /LPS. Adjusted  $p \leq 0.05$  and cut-off values  $\log_{2}FC \geq 1$  or  $\log_{2}FC \leq -1$ .

(F) Immunoblot analysis of *Mkl<sup>-/-</sup>* or *Casp8<sup>-/-</sup>Mkl<sup>-/-</sup>* BMDMs (left) or *Ripk3<sup>-/-</sup>* or *Casp8<sup>-/-</sup>Ripk3<sup>-/-</sup>* BMDMs (right) treated with IFN $\gamma$  (50 ng/mL) overnight then with LPS (50 ng/mL) for 24 h (left) or 16 or 26 h (right) (n = 3).

(G) Nitrite (NO $_2^-$ ) concentrations in cell supernatants from WT and *Mkl<sup>-/-</sup>* and *Casp8<sup>-/-</sup>Mkl<sup>-/-</sup>* BMDMs treated with IFN $\gamma$  (50 ng/mL) overnight then with LPS (50 ng/mL) for 24 or 48 h as measured by the Griess assay (n = 4).

(H) WT, *Mkl<sup>-/-</sup>* and *Casp8<sup>-/-</sup>Mkl<sup>-/-</sup>* BMDMs were treated with IFN $\gamma$  (50 ng/mL) overnight then with LPS (50 ng/mL) for 8, 12, 24 h. Nitrite (NO $_2^-$ ) production was measured by the Griess assay. Maximal, LPS-induced NO $_2^-$  production [NO $_2^-$ ] $_{max}$  was determined by subtracting the concentration of NO $_2^-$  post-IFN $\gamma$  priming (i.e. LPS at time 0) (right). NO $_2^-$  concentrations at 8 and 12 hours were similarly normalized to the IFN $\gamma$ -priming amounts and displayed as a percentage of the [NO $_2^-$ ] $_{max}$  (left) (n = 2).

(I) Nitrite (NO $_2^-$ ) concentrations at 48h in cell supernatants from WT and *Bax<sup>-/-</sup>Bak<sup>-/-</sup>* BMDMs analyzed in Figure 2C (left), or WT and *Tnf<sup>-/-</sup>Fas<sup>gld/gld</sup>Trail<sup>-/-</sup>* BMDMs analyzed in Figure 1C (right), was measured by the Griess assay (n = 3). Data represent the mean value  $\pm$  SD, or a representative immunoblot, from indicated n independent experiments.  $p > 0.05$  (n.s.),  $p \leq 0.05$  (\*),  $p \leq 0.001$  (\*\*\*),  $p \leq 0.0001$  (\*\*\*\*).

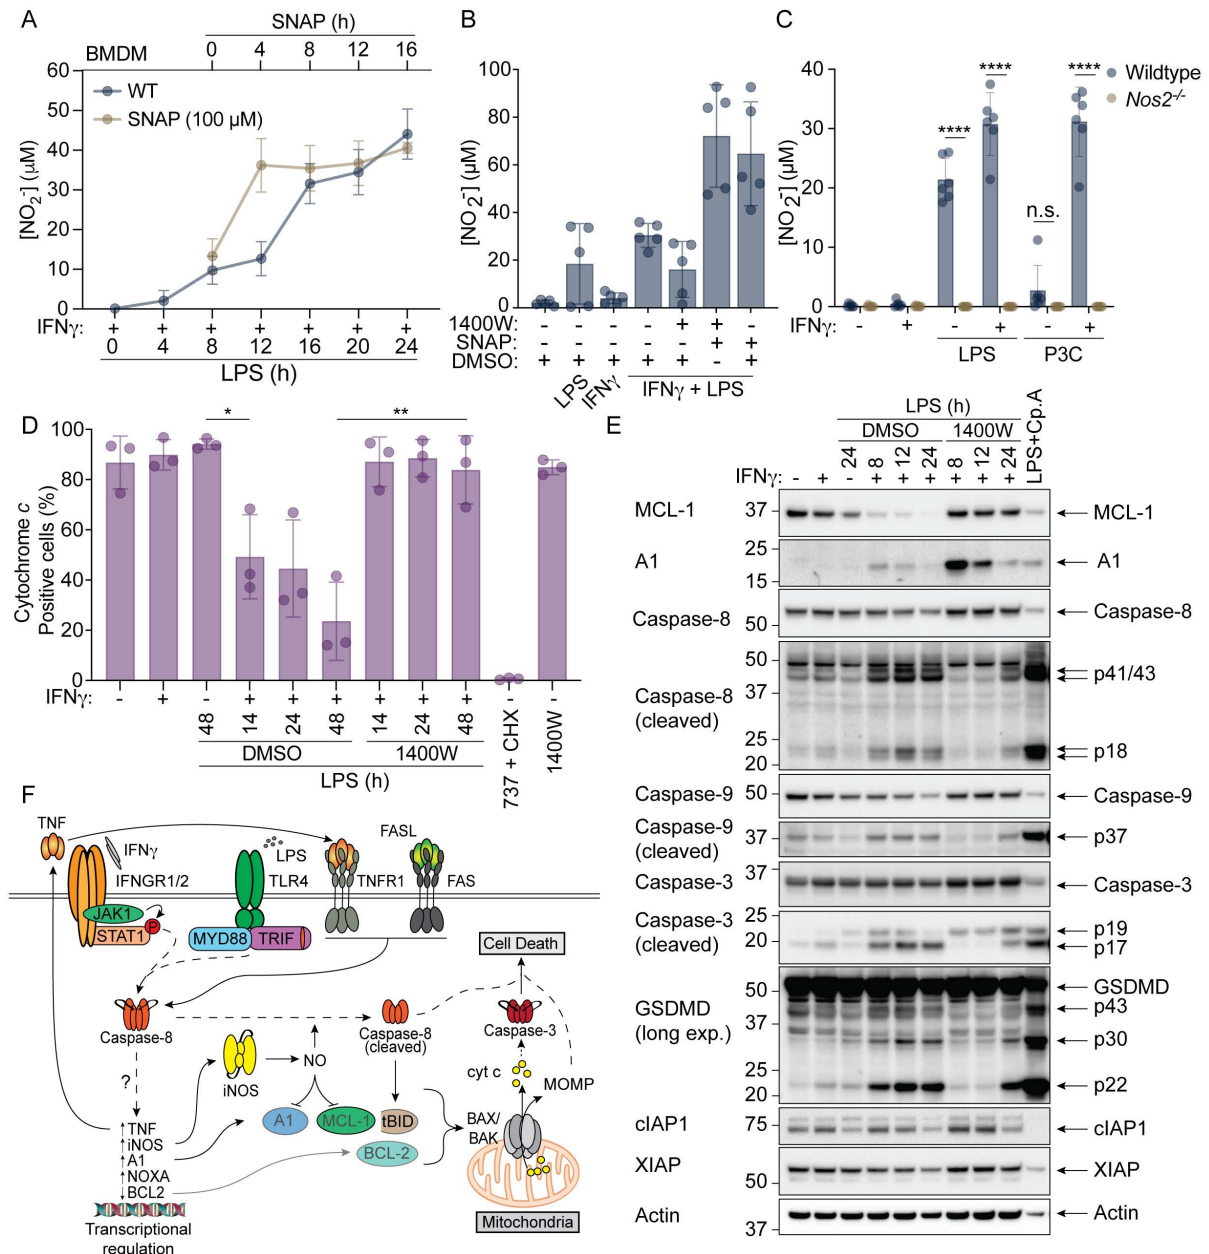

**Figure S7. iNOS activity promotes caspase processing and destabilization of A1 and MCL-1 to orchestrate IFN $\gamma$ /LPS-induced cell death. Related to Figure 6.**

(A) WT BMDMs were treated with IFN $\gamma$  (50 ng/mL) overnight then with LPS (50 ng/mL) ( $n = 4$ ), or treated with SNAP (100  $\mu$ M) only ( $n = 2$ ). Time 0 is denoted as the addition of LPS (Bottom x-axis), or SNAP (Top x-axis). Nitrite (NO $_2^-$ ) production was measured by the Griess assay.

(B) Nitrite (NO $_2^-$ ) production of supernatants from cells analyzed in Figure 6D was measured by the Griess assay ( $n = 5$ ).

(C) Nitrite (NO $_2^-$ ) production of supernatants from cells analyzed in Figure 6F was measured by the Griess assay ( $n = 6$ ).

(D) WT BMDMs primed with IFN $\gamma$  (50 ng/mL) overnight and then stimulated with LPS (50 ng/mL)  $\pm$  1400W (10  $\mu$ M) or DMSO as a control. BMDMs treated with ABT-737 (1  $\mu$ M) plus cycloheximide (CHX, 10  $\mu$ g/mL) for 4 h are shown as a positive control for BAX/BAK-mediated cytochrome *c* release. Cytochrome *c* retention was measured by intracellular cytochrome *c* staining and flow cytometric analysis ( $n = 3$ ).

(E) Immunoblot of WT BMDMs treated with IFN $\gamma$  (50 ng/mL) overnight then with LPS (50 ng/mL) for 8, 12 or 24 h  $\pm$  1400W (10  $\mu$ M) or vehicle. As controls for cell death pathway activation, BMDMs were also treated with LPS and Cp.A (1  $\mu$ M) for 12 h ( $n = 3$ ).

(F) Model depicting IFN $\gamma$  priming and TLR activation induced macrophage cell death. IFN $\gamma$  priming followed by LPS stimulation triggers caspase-8-regulated transcription of TNF, iNOS, A1 and NOXA. Caspase-8 also limits LPS-induced expression of *Bcl2*. Autocrine TNF and FASL production contribute to the caspase-8-mediated cell death response. iNOS expression licenses caspase-8 processing via the activity of nitric oxide (NO), which in-turn promotes cleavage of BID. iNOS also limits expression of A1 and promotes MCL-1 degradation, which likely combines with reduced amounts of BCL-2 and activated BID to activate BAX and BAK-mediated mitochondrial outer membrane permeabilization (MOMP) and cytochrome *c* release into the cytosol. Cytochrome *c* release and apoptosome formation allows for caspase-3 and caspase-7 triggering and consequent rapid apoptosis. In the absence of BAX and BAK, caspase-8 activity drives MOMP-independent cell death.

Data represent the mean value  $\pm$  SD, or a representative immunoblot, from indicated n independent experiments.  $p \leq 0.05$  (\*),  $p \leq 0.01$  (\*\*),  $p \leq 0.0001$  (\*\*\*\*).

**Table S1. Boutique list of genes associated with the major cell death pathways; Intrinsic and Extrinsic apoptosis, Pyroptosis and Necroptosis. Related to Figure 4C and 4D.**

| Extrinsic apoptosis |                | Intrinsic apoptosis |                     | Pyroptosis    |             | Necroptosis  |       |
|---------------------|----------------|---------------------|---------------------|---------------|-------------|--------------|-------|
| Gene                | Alias          | Gene                | Alias               | Gene          | Alias       | Gene         | Alias |
| <i>Tnf</i>          | TNF            | <i>Casp9</i>        | caspase-9           | <i>Casp11</i> | caspase-11  | <i>Ripk3</i> | RIPK3 |
| <i>Tnfrsf1a</i>     | TNFR1          | <i>Apaf1</i>        | APAF1               | <i>Gsdme</i>  | GSDME       | <i>Mkl1</i>  | MLKL  |
| <i>Tnfrsf1b</i>     | TNFR2          | <i>Cyts</i>         | cytochrome <i>c</i> | <i>Gsdmd</i>  | GSDMD       | <i>Zbp1</i>  | ZBP1  |
| <i>Tnfrsf10a</i>    | DR4            | <i>Bax</i>          | BAX                 | <i>Casp1</i>  | caspase-1   |              |       |
| <i>Tnfrsf10b</i>    | DR5            | <i>Bak</i>          | BAK                 | <i>Nlrp3</i>  | NLRP3       |              |       |
| <i>Tnfsf10</i>      | TRAIL          | <i>Bok</i>          | BOK                 | <i>Aim2</i>   | AIM2        |              |       |
| <i>Fasl</i>         | FASL           | <i>Bcl2</i>         | BCL-2               | <i>Mefv</i>   | Pyrin       |              |       |
| <i>Fas</i>          | FAS            | <i>Bcl2l1</i>       | BCL-XL              | <i>Pycard</i> | ASC         |              |       |
|                     | TWEAK          | <i>Bcl2a1a</i>      | A1                  | <i>Nlrp1b</i> | NLRP1       |              |       |
| <i>Tnfrsf12a</i>    | TWEAK Receptor | <i>Bcl2a1b</i>      | A1                  | <i>Nek7</i>   | NEK7        |              |       |
| <i>Ripk1</i>        | RIPK1          | <i>Bcl2a1c</i>      | A1                  | <i>Birc1</i>  | NAIP        |              |       |
| <i>Tradd</i>        | TRADD          | <i>Bcl2a1d</i>      | A1                  | <i>Nlrc4</i>  | NLRC4       |              |       |
| <i>Traf2</i>        | TRAF2          | <i>Bcl2l2</i>       | BCL-W               | <i>I11b</i>   | II1 $\beta$ |              |       |
| <i>Birc2</i>        | cIAP1          | <i>Bcl2l11</i>      | BIM                 | <i>I118</i>   | II18        |              |       |
| <i>Birc3</i>        | cIAP2          | <i>Bid</i>          | BID                 |               |             |              |       |
| <i>Hoip</i>         | HOIP           | <i>Bad</i>          | BAD                 |               |             |              |       |
| <i>Hoil-1</i>       | HOIL           | <i>Bbc3</i>         | PUMA                |               |             |              |       |
| <i>Sharpin</i>      | SHARPIN        | <i>Pmaip1</i>       | NOXA                |               |             |              |       |
| <i>Tnfaip3</i>      | A20            | <i>Bik</i>          | BIK                 |               |             |              |       |
| <i>Mib1</i>         | MIB1           | <i>Bmf</i>          | BMF                 |               |             |              |       |
| <i>Mib2</i>         | MIB2           | <i>Hrk</i>          | HRK                 |               |             |              |       |
| <i>Birc4</i>        | XIAP           |                     |                     |               |             |              |       |
| <i>Cyld</i>         | CYLD           |                     |                     |               |             |              |       |
| <i>Spata2</i>       | SPATA2         |                     |                     |               |             |              |       |
| <i>Map3k7</i>       | TAK1           |                     |                     |               |             |              |       |
| <i>Mapk14</i>       | p38            |                     |                     |               |             |              |       |
| <i>Mapkapk2</i>     | MK2            |                     |                     |               |             |              |       |
| <i>Cflar</i>        | cFLIP          |                     |                     |               |             |              |       |
| <i>Fadd</i>         | FADD           |                     |                     |               |             |              |       |
| <i>Casp8</i>        | caspase-8      |                     |                     |               |             |              |       |
| <i>Casp3</i>        | caspase-3      |                     |                     |               |             |              |       |
| <i>Casp6</i>        | caspase-6      |                     |                     |               |             |              |       |
| <i>Casp7</i>        | caspase-7      |                     |                     |               |             |              |       |



**Table S2. Apoptosis related Gene Ontology pathways enriched in IFN $\gamma$ /LPSstimulated *Mik1<sup>-/-</sup>* BMDMs or *Casp8<sup>-/-</sup>Mik1<sup>-/-</sup>* BMDMs<sup>a</sup>. Related to Figure 4 and Supplementary Figure S4.**

| GO Term    | Description                                                                               |
|------------|-------------------------------------------------------------------------------------------|
| GO:0008625 | Extrinsic apoptotic signaling pathway via death domain receptors                          |
| GO:0008630 | Intrinsic apoptotic signaling pathway in response to DNA damage                           |
| GO:0043154 | Negative regulation of cysteine-type endopeptidase activity involved in apoptotic process |
| GO:0043281 | Regulation of cysteine-type endopeptidase activity involved in apoptotic process          |
| GO:0097190 | Apoptotic signaling pathway                                                               |
| GO:0097191 | Extrinsic apoptotic signaling pathway                                                     |
| GO:0097192 | Extrinsic apoptotic signaling pathway in absence of ligand                                |
| GO:0097193 | Intrinsic apoptotic signaling pathway                                                     |
| GO:1902041 | Regulation of extrinsic apoptotic signaling pathway via death domain receptors            |
| GO:1902042 | Negative regulation of extrinsic apoptotic signaling pathway via death domain receptors   |
| GO:2001233 | Regulation of apoptotic signaling pathway                                                 |
| GO:2001234 | Negative regulation of apoptotic signaling pathway                                        |
| GO:2001236 | Regulation of extrinsic apoptotic signaling pathway                                       |
| GO:2001237 | Negative regulation of extrinsic apoptotic signaling pathway                              |
| GO:0034392 | Negative regulation of smooth muscle cell apoptotic process                               |
| GO:0008637 | Apoptotic mitochondrial changes                                                           |
| GO:0090199 | Regulation of release of cytochrome c from mitochondria                                   |
| GO:0034390 | Smooth muscle cell apoptotic process                                                      |
| GO:0034391 | Regulation of smooth muscle cell apoptotic process                                        |
| GO:0010660 | Regulation of muscle cell apoptotic process                                               |
| GO:0090201 | Negative regulation of release of cytochrome c from mitochondria                          |
| GO:0043154 | Negative regulation of cysteine-type endopeptidase activity involved in apoptotic process |
| GO:0010657 | Muscle cell apoptotic process                                                             |
| GO:0010656 | Negative regulation of muscle cell apoptotic process                                      |
| mmu04210   | Apoptosis                                                                                 |

<sup>a</sup> Listed gene ontology pathways were significantly enriched (adjusted  $p < 0.05$ ,  $\log_{2}FC < - 1$  or  $\log_{2}FC > 1$ ) in either *Casp8<sup>-/-</sup>Mik1<sup>-/-</sup>* or *Mik1<sup>-/-</sup>* BMDMs in our RNA-seq dataset.



**Table S3. Apoptosis related Gene Ontology (GO) gene list<sup>a</sup> of significant differentially expressed genes in IFN $\gamma$ /LPS stimulated *Mik1<sup>-/-</sup>* BMDMs or *Casp8<sup>-/-</sup>Mik1<sup>-/-</sup>* BMDMs. Related to Figure 4 and Supplemental Figure S5F.**

| Gene           | Alias                                                                                         | Gene            | Alias                                                              |
|----------------|-----------------------------------------------------------------------------------------------|-----------------|--------------------------------------------------------------------|
| <i>Adora2a</i> | Adenosine receptor A2a                                                                        | <i>Il6</i>      | Interleukin-6                                                      |
| <i>Arrb2</i>   | $\beta$ -arrestin-2                                                                           | <i>Inhba</i>    | Inhibin beta A chain                                               |
| <i>Bcl2</i>    | BCL-2                                                                                         | <i>Itgav</i>    | Integrin alpha-V                                                   |
| <i>Bcl2a1a</i> | Bcl-2-related protein A1                                                                      | <i>Ivns1abp</i> | Influenza virus NS1A-binding protein                               |
| <i>Bcl2a1b</i> | B-cell leukemia/lymphoma 2 related protein A1b                                                | <i>Jun</i>      | Transcription factor AP-1                                          |
| <i>Bcl2a1c</i> | B-cell leukemia/lymphoma 2 related protein A1c                                                | <i>Klf4</i>     | Krueppel-like factor 4                                             |
| <i>Bcl2a1d</i> | A1-d protein                                                                                  | <i>Lck</i>      | Tyrosine-protein kinase Lck                                        |
| <i>Bcl2l14</i> | Apoptosis facilitator Bcl-2-like protein 14                                                   | <i>Lcn2</i>     | Neutrophil gelatinase-associated lipocalin                         |
| <i>Casp12</i>  | caspase-12                                                                                    | <i>Malt1</i>    | Mucosa-associated lymphoid tissue lymphoma translocation protein 1 |
| <i>Casp2</i>   | caspase-2                                                                                     | <i>Mapk9</i>    | Mitogen-activated protein kinase 9                                 |
| <i>Casp3</i>   | caspase-3                                                                                     | <i>Mical1</i>   | [F-actin]-monooxygenase MICAL1                                     |
| <i>Casp8</i>   | caspase-8                                                                                     | <i>Mmp9</i>     | Matrix metalloproteinase-9                                         |
| <i>Chac1</i>   | Glutathione-specific gamma-glutamylcyclotransferase 1                                         | <i>Mnt</i>      | Max-binding protein MNT                                            |
| <i>Ctsk</i>    | Cathepsin K                                                                                   | <i>Nck1</i>     | Cytoplasmic protein NCK1                                           |
| <i>Ctsl</i>    | Pro-cathepsin L                                                                               | <i>Nlrp3</i>    | NACHT, LRR and PYD domains-containing protein 3                    |
| <i>Ctss</i>    | Cathepsin S                                                                                   | <i>Nupr1</i>    | Nuclear protein 1                                                  |
| <i>Daxx</i>    | Death domain associated protein 6                                                             | <i>Pmaip1</i>   | Phorbol-12-myristate-13-acetate-induced protein 1 (NOXA)           |
| <i>Ddit4</i>   | DNA-damage inducible transcript 4                                                             | <i>Ppard</i>    | Peroxisome proliferator-activated receptor delta                   |
| <i>Ddx3x</i>   | ATP-dependent RNA helicase DDX3X                                                              | <i>Ptgs2</i>    | Prostaglandin G/H synthase 2                                       |
| <i>Dipk2a</i>  | Divergent protein kinase domain 2A                                                            | <i>Ptpn1</i>    | Tyrosine-protein phosphatase non-receptor type 1                   |
| <i>Edn1</i>    | Endothelin-1                                                                                  | <i>Raf1</i>     | RAF proto-oncogene serine/threonine-protein kinase                 |
| <i>Eng</i>     | Endoglin                                                                                      | <i>Rffl</i>     | E3 ubiquitin-protein ligase rififylin                              |
| <i>Gadd45g</i> | Growth arrest and DNA damage-inducible protein GADD45 gamma                                   | <i>Runx3</i>    | Runt-related transcription factor 3                                |
| <i>Gas6</i>    | Growth arrest-specific protein 6                                                              | <i>Serpine1</i> | Plasminogen activator inhibitor 1                                  |
| <i>Gpx1</i>    | Glutathione peroxidase 1                                                                      | <i>Sfn</i>      | 14-3-3 protein sigma                                               |
| <i>Herpud1</i> | Homocysteine-responsive endoplasmic reticulum-resident ubiquitin-like domain member 1 protein | <i>Sgms1</i>    | Phosphatidylcholine:ceramide cholinephosphotransferase 1           |
| <i>Hmox1</i>   | Heme oxygenase 1                                                                              | <i>Sgpp1</i>    | Sphingosine-1-phosphate phosphatase 1                              |
| <i>Hspa1b</i>  | Heat shock 70 kDa protein 1B                                                                  | <i>Tnfaip3</i>  | Tumor necrosis factor alpha-induced protein 3 (A20)                |
| <i>Ier3</i>    | Radiation-inducible immediate-early gene IEX-1                                                | <i>Tnfsf10</i>  | Tumor necrosis factor ligand superfamily member 10 (TRAIL)         |
| <i>Igf1</i>    | Insulin-like growth factor I                                                                  | <i>Trib3</i>    | Tribbles homolog 3                                                 |
| <i>Il1a</i>    | Interleukin-1-alpha                                                                           | <i>Vdr</i>      | Vitamin D3 receptor                                                |
| <i>Il1b</i>    | Interleukin-1-beta                                                                            |                 |                                                                    |

<sup>a</sup> This composite genes list was derived from all GO pathways identified in Table S2.

**Table S4. Table of oligonucleotide primers used to assess gene expression by qPCR. Related to Figure 4F, S1B and S2B.**

| Oligonucleotide                                                     | Source                      | Identifier                                         |
|---------------------------------------------------------------------|-----------------------------|----------------------------------------------------|
| qPCR primer for mm <i>I8S</i> (For: 5' GTAACCCGTTGAACCCATT)         | Integrated DNA Technologies | N/A                                                |
| qPCR primer for mm <i>I8S</i> (Rev: 5' CCATCCAATCGGTAGTAGCG)        | Integrated DNA Technologies | N/A                                                |
| qPCR primer for mm <i>Bcl2</i> (For: 5' CCTGTGGATGACTGAGTACCTG)     | Integrated DNA Technologies | <i>OriGene Technologies Inc.</i><br>Cat#: MP201255 |
| qPCR primer for mm <i>Bcl2</i> (Rev: 5' AGCCAGGAGAAATCAAACAGAGG)    | Integrated DNA Technologies | <i>OriGene Technologies Inc.</i><br>Cat#: MP201255 |
| qPCR primer for mm <i>CD86</i> (For: 5' TCAGTGATCGCCAACCTCAG)       | Integrated DNA Technologies | N/A                                                |
| qPCR primer for mm <i>CD86</i> (Rev: 5' TTAGGTTTCGGGTGACCTTG)       | Integrated DNA Technologies | N/A                                                |
| qPCR primer for mm <i>Fasl</i> (For: 5' GAAGGAACTGGCAGAACTCCGT)     | Integrated DNA Technologies | <i>OriGene Technologies Inc.</i><br>Cat#: MP204632 |
| qPCR primer for mm <i>Fasl</i> (Rev: 5' GCCACACTCCTCGGCTCTTTTT)     | Integrated DNA Technologies | <i>OriGene Technologies Inc.</i><br>Cat#: MP204632 |
| qPCR primer for mm <i>Fas</i> (For: 5' CTGCGATTCTCCTGGCTGTGAA)      | Integrated DNA Technologies | <i>OriGene Technologies Inc.</i><br>Cat#: MP204625 |
| qPCR primer for mm <i>Fas</i> (Rev: 5' CAACAACCATAGGCGATTTCTGG)     | Integrated DNA Technologies | <i>OriGene Technologies Inc.</i><br>Cat#: MP204625 |
| qPCR primer for mm <i>Hprt</i> (For: 5' TGAAGTACTCATTATAGTCAAGGGCA) | Integrated DNA Technologies | N/A                                                |
| qPCR primer for mm <i>Hprt</i> (Rev: 5' CTGGTGAAAAGGACCTCTCG)       | Integrated DNA Technologies | N/A                                                |
| qPCR primer for mm <i>Il10</i> (For: 5' GGTTGCCAGCCTTATCGGA)        | Integrated DNA Technologies | N/A                                                |
| qPCR primer for mm <i>Il10</i> (Rev: 5' ACCTGCTCCACTGCCTTGCT)       | Integrated DNA Technologies | N/A                                                |
| qPCR primer for mm <i>Il1b</i> (For: 5' AGTTGACGGACCCCAAAG)         | Integrated DNA Technologies | N/A                                                |

|                                                                      |                             |                                                    |
|----------------------------------------------------------------------|-----------------------------|----------------------------------------------------|
| qPCR primer for mm <i>Il1b</i> (Rev: 5' AGCTGGATGCTCTCATCAGG)        | Integrated DNA Technologies | N/A                                                |
| qPCR primer for mm <i>Nos2</i> (For: 5' GCCACCAACAATGGCAACA)         | Integrated DNA Technologies | N/A                                                |
| qPCR primer for mm <i>Nos2</i> (Rev: 5' CGTACCGGATGAGCTGTGAATT)      | Integrated DNA Technologies | N/A                                                |
| qPCR primer for mm <i>Tnfrsf10b</i> (For: 5' TGTGTCGATGCAAACCAGGCAC) | Integrated DNA Technologies | <i>OriGene Technologies Inc.</i><br>Cat#: MP217750 |
| qPCR primer for mm <i>Tnfrsf10b</i> (Rev: 5' GCCGTTTTGGAGACACACTTCC) | Integrated DNA Technologies | <i>OriGene Technologies Inc.</i><br>Cat#: MP217750 |
| qPCR primer for mm <i>Tnfsf10</i> (For: 5' GGAAGACCTCAGAAAGTGGCAG)   | Integrated DNA Technologies | <i>OriGene Technologies Inc.</i><br>Cat#: MP217736 |
| qPCR primer for mm <i>Tnfsf10</i> (Rev: 5' TTTCCGAGAGGACTCCCAGGAT)   | Integrated DNA Technologies | <i>OriGene Technologies Inc.</i><br>Cat#: MP217736 |
| qPCR primer for mm <i>Ym1</i> (For: 5' GGGCATAACCTTTATCCTGAG)        | Integrated DNA Technologies | N/A                                                |
| qPCR primer for mm <i>Ym1</i> (Rev: 5' CCACTGAAGTCATCCATGTC)         | Integrated DNA Technologies | N/A                                                |
